# Supplementary material for: miR-335-laden B Cell-Derived Extracellular Vesicles Promote SOX4-Dependent Apoptosis in Human Multiple Myeloma Cells
Source: MDPI journal article supplement (doi:10.3390/jpm11121240), 2021-11-23
Supplement: s1 [file s1]

## Supplementary Matherial

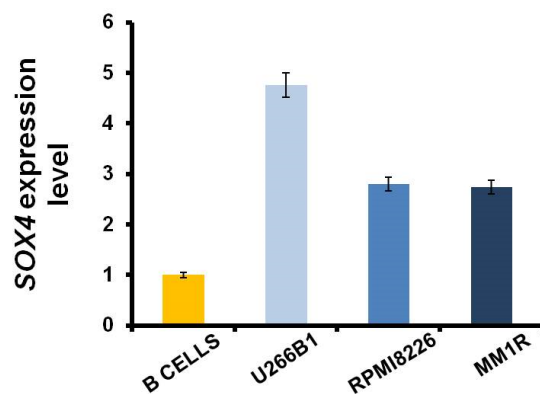

**Figure S1.** Analysis of *SOX4* RNA expression in MM cells compared with Bcells. *SOX4* expression level in MM cell lines evaluated by RT-qPCR using B cells as control. The analysis was the combination of three experiments running each one in triplicate using the threshold.
